# Supplementary material for: Ecological niche adaptation of Salmonella Typhimurium U288 is associated with altered pathogenicity and reduced zoonotic potential
Source: PubMed Central journal article supplement (PMC8065163; doi:10.1038/s42003-021-02013-4), 2021-04-23
Supplement: 42003_2021_2013_MOESM1_ESM.pdf [file 42003_2021_2013_MOESM1_ESM.pdf]

# Ecological niche adaptation of a bacterial pathogen associated with reduced zoonotic potential

## Supplementary Figures and Tables

Mark Kirkwood<sup>1</sup>, Prerna Vohra<sup>2</sup>, Matt Bawn<sup>1,3</sup>, Gaëtan Thilliez<sup>1</sup>, Hannah Pye<sup>1</sup>, Jennifer Tanner<sup>1</sup>, Cosmin Chintoan-Uta<sup>2</sup>, Priscilla Branchu<sup>1</sup>, Liljana Petrovska<sup>4</sup>, Timothy Dallman<sup>5</sup>,  
Neil Hall<sup>3</sup>, Mark P. Stevens<sup>2</sup> and Robert A. Kingsley<sup>1,6\*</sup>

<sup>1</sup> Quadram Institute Biosciences, Norwich Research Park, Norwich, UK

<sup>2</sup> Roslin Institute, Edinburgh, UK

<sup>3</sup> Earlham Institute, Norwich Research Park, Norwich, UK

<sup>4</sup> Animal and Plant Health Agency, Addlestone, UK

<sup>5</sup> Gastrointestinal Bacteria Reference Unit, National Infection Service, Public Health England, London, UK

<sup>6</sup> University of East Anglia, Norwich, UK

\*Correspondence: [rob.kingsley@quadram.ac.uk](mailto:rob.kingsley@quadram.ac.uk)

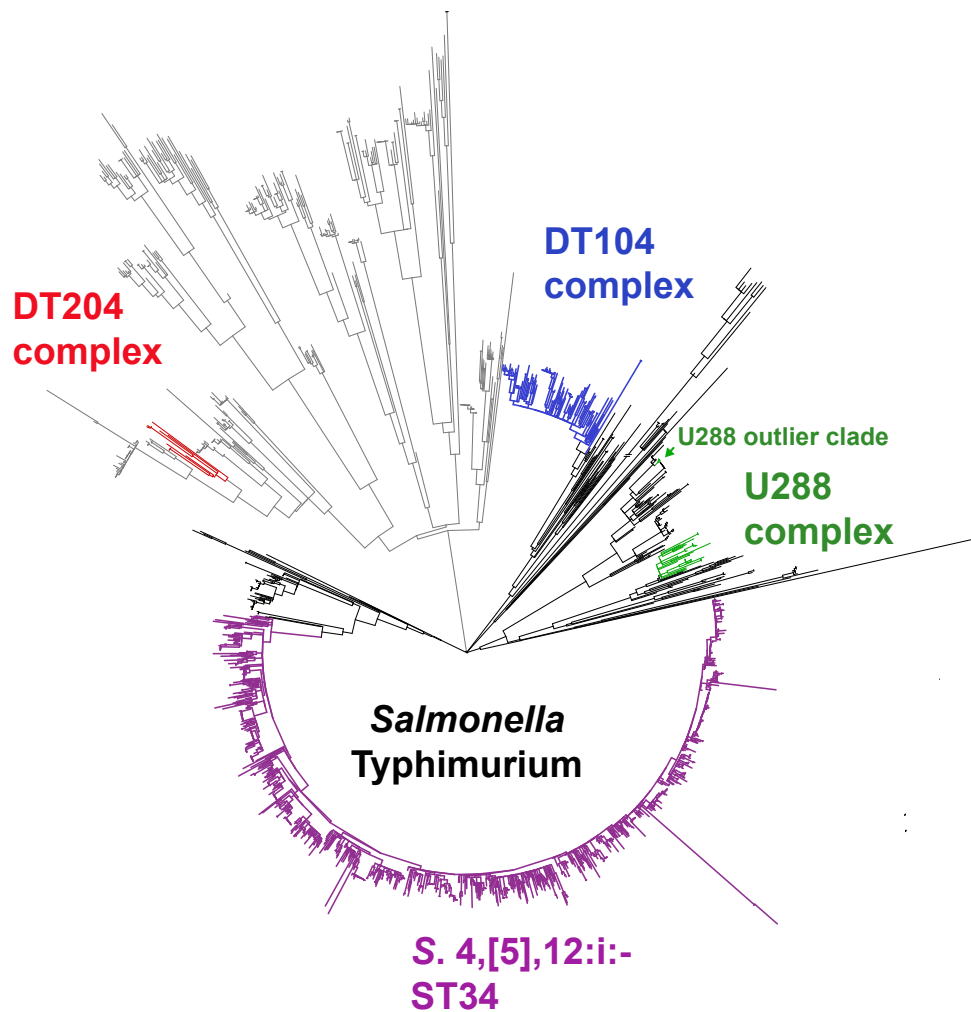

**Supplementary Figure 1.** Maximum likelihood estimation of the phylogeny of 1826 *S. Typhimurium* and monophasic *S. Typhimurium* isolated from human clinical infections in England and Wales in 2014-2015. Lineages comprising the U288 complex (green), ST34 (purple), DT104 complex (blue) and DT204 complex (red) clades are indicated.

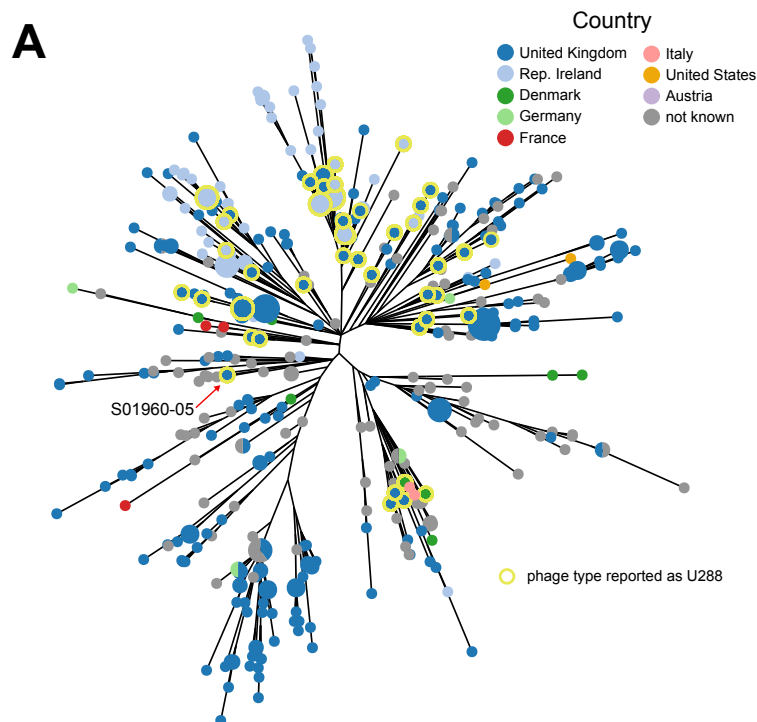

**B**

| Country | no. HCC20-201 in enterobase | no. <i>S. Typhimurium</i> in enterobase | HCC20-201 (%) |
|---------|-----------------------------|-----------------------------------------|---------------|
| Austria | 1                           | 13                                      | 8             |
| Denmark | 8                           | 1139                                    | 0.7           |
| France  | 3                           | 1947                                    | 0.15          |
| Germany | 4                           | 476                                     | 0.8           |
| Ireland | 71                          | 1039                                    | 7             |
| Italy   | 2                           | 40                                      | 5             |
| UK      | 254                         | 12103                                   | 2             |
| US      | 2                           | 8802                                    | 0.02          |

**Supplementary Figure 2. Minimum spanning tree showing the relationship of *S. Typhimurium***

**Enterobase hierarchical cluster HCC20-201 containing the main U288 clade. (A) Whole genome**

sequences with the same allelic profile are indicated by circles colour coded by the country source according to the key (inset). Where the phage type was reported as U288 (yellow ring) are indicated.

(B) Table reporting the number of HCC20-201 genomes from each represented country and the percentage of *S. Typhimurium* genomes of isolates to each country in the Enterobase database that were in HCC20-201.

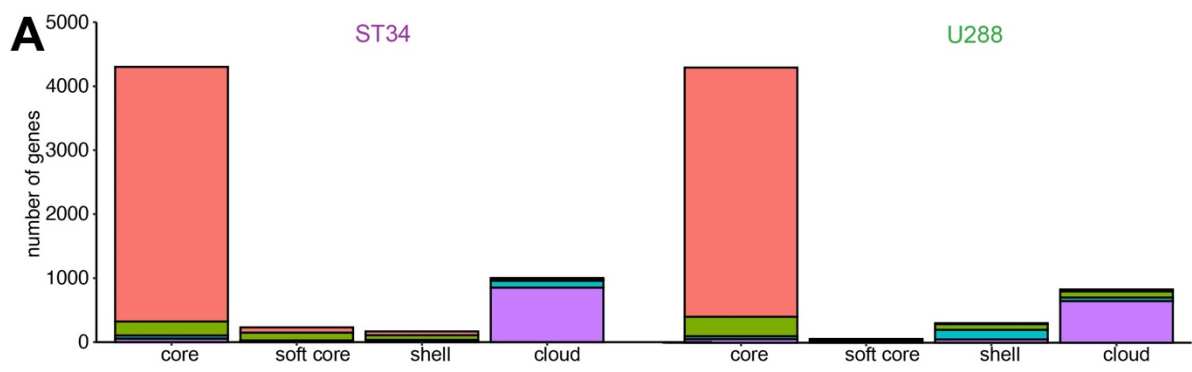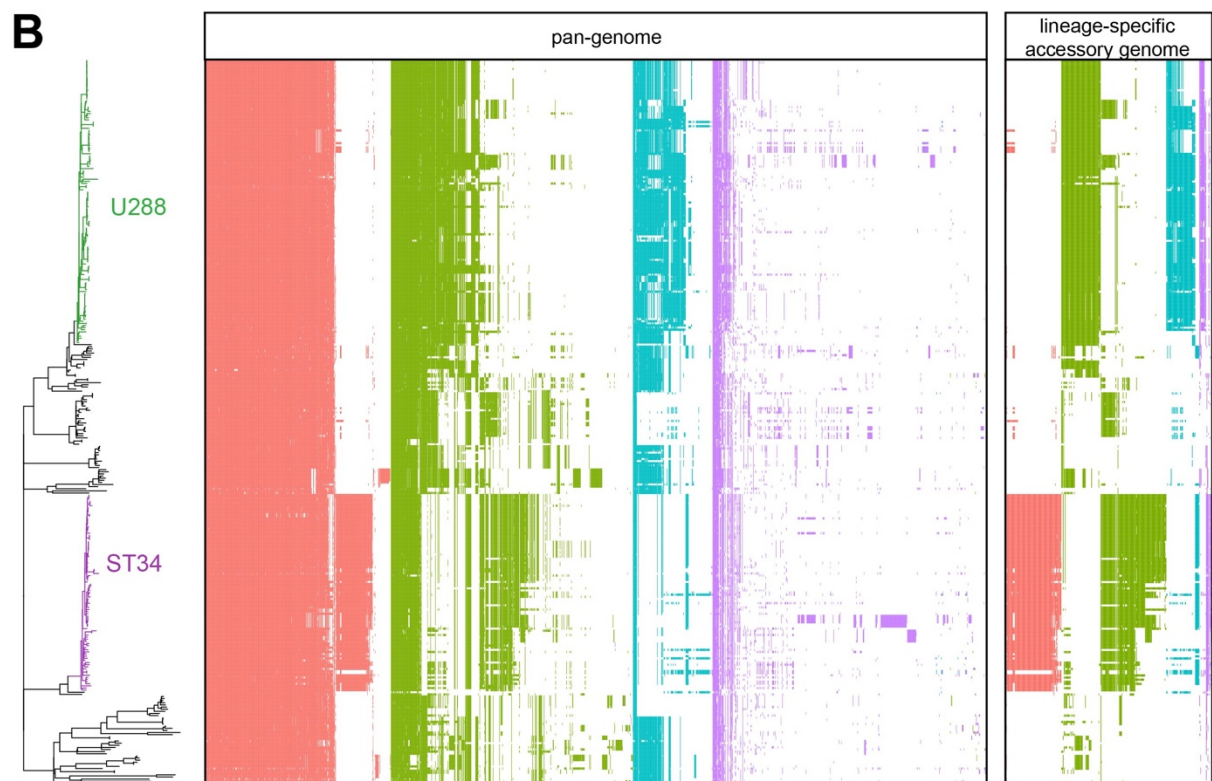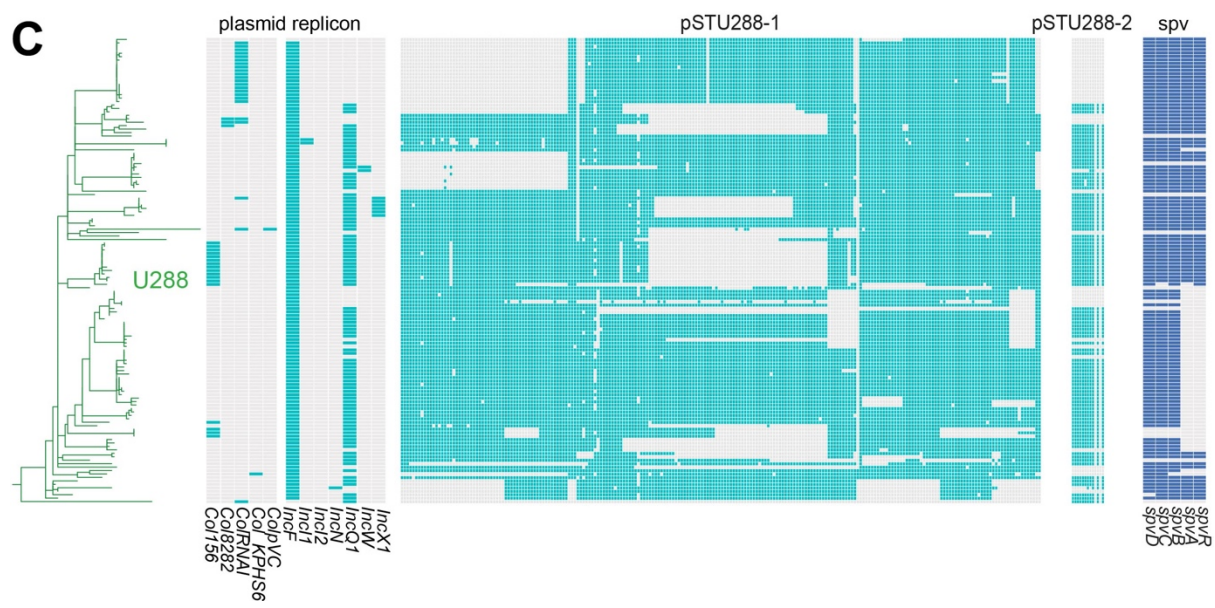

**Supplementary Figure 3. Analysis of the pangenome of *S. Typhimurium* U288 and ST34. (A)**

Summary of gene families in the core, softcore, shell and cloud genomes, subdivided to indicate contribution of non-phage genes present on the chromosome (red), phage genome (green), plasmid genes (cyan) and unclassified (purple). (B) presence of gene families within *S. Typhimurium* with U288 lineages (green) and ST34 (purple) indicated. Maximum likelihood tree is the same as that in Figure 2. Filled boxes indicate a gene family (columns) colour coded for non-phage genes present on the chromosome (red), phage genome (green), plasmid genes (cyan) and unclassified (purple). (C) Plasmid replicons, plasmid genes (pU288-1 and pU288-2) and *spv* genes present in the whole genome sequence of U288 strains.

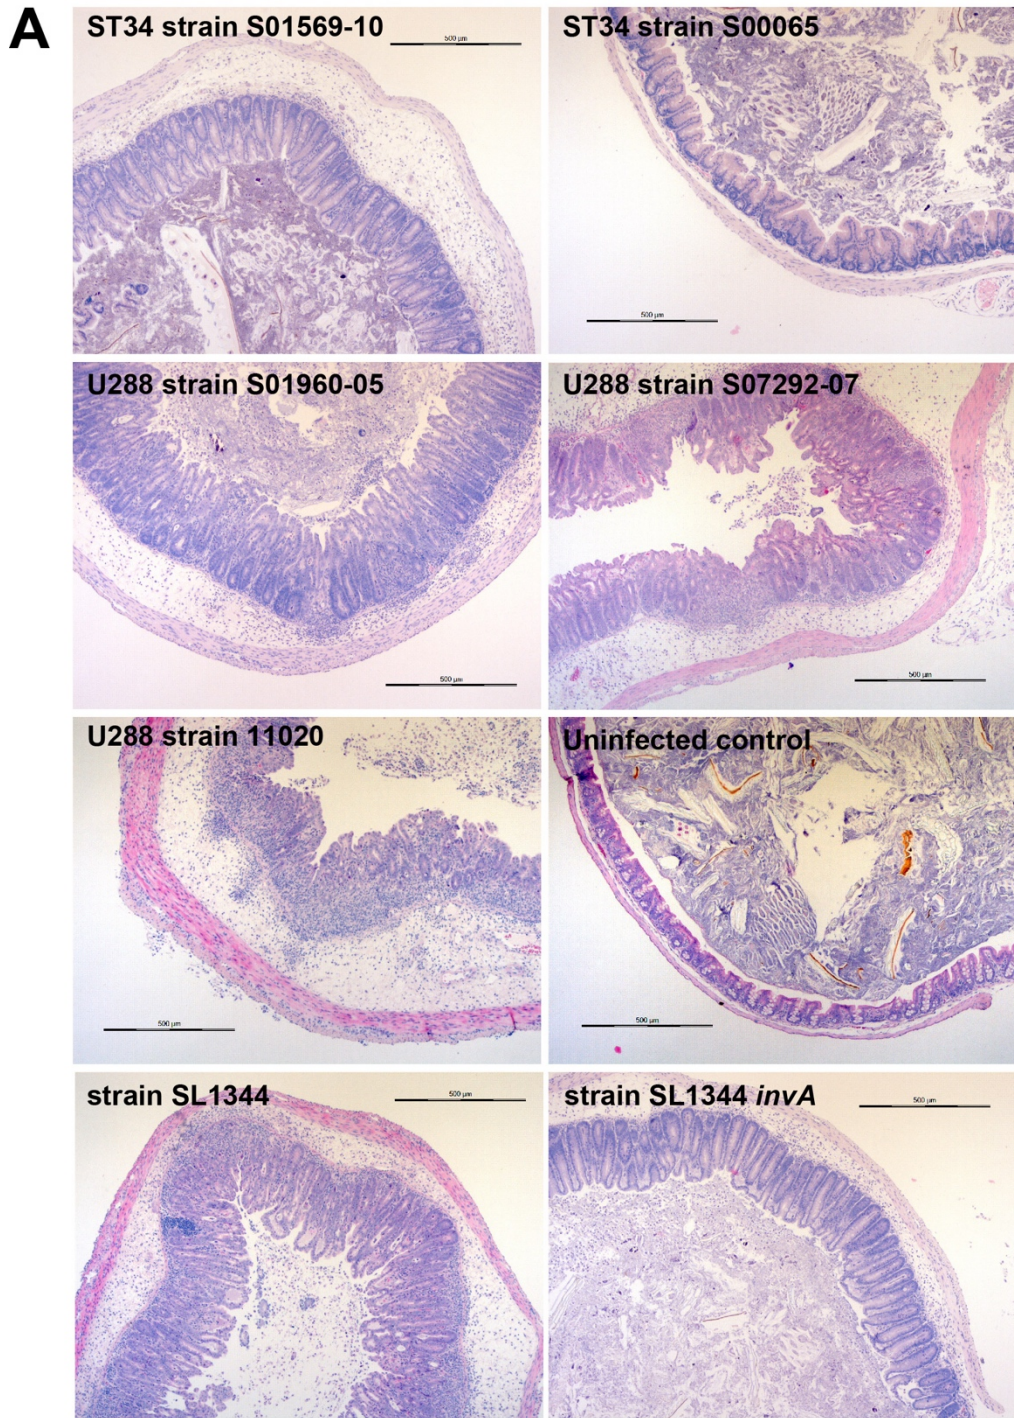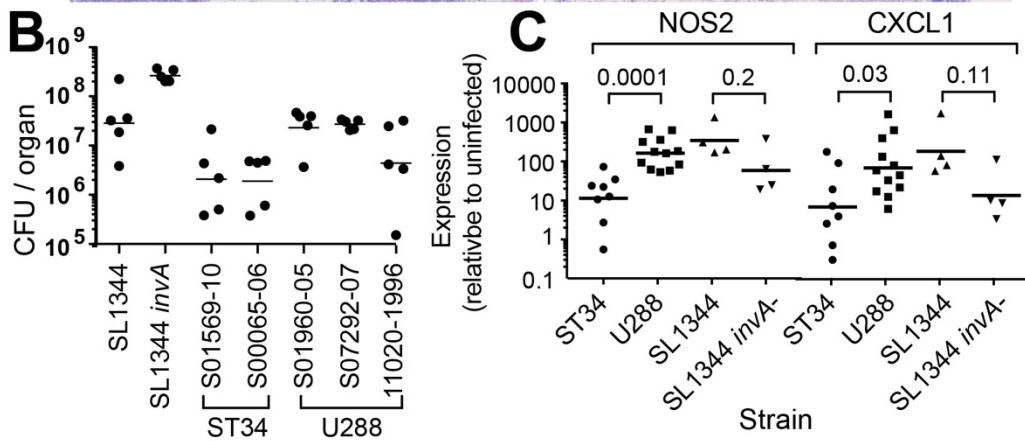

**Supplementary Figure 4. Colonisation of C57bl/6 mice and immune response following oral inoculation with *S. Typhimurium* U288 or ST34.** (A) Hemotoxylin and eosin stained 5 µm sections of murine cecum from streptomycin pretreated mice infected with ST34 strains S01569-10 or S00065-06, U288 strains S01960-05, S07292-07 or 11020-1996, PBD pH7.4 uninfected control, strain SL1344 or SL1344 with a deletion in the *invA* gene. (B) Viable counts of *Salmonella* recovered from the cecum of mice on day 3 post inoculation. (C) Expression of Nos-2 and Cxcl-1 in cecal tissue of mice relative to expression in uninfected control mice determined by real-time PCR using the delta-delta Ct method. P-values using the Mann-Whitney test of significance for comparison of fold change in expression are indicated.

**Supplementary Table 1.** Oligonucleotide primers used in this study.

| primer name                  | sequence 5'-3'                                                                    | Notes                           |
|------------------------------|-----------------------------------------------------------------------------------|---------------------------------|
| Primers for WITS construct   |                                                                                   |                                 |
| oGT05_WITS_3                 | aggattagcctctctatgaatgccggatggcggcgtgaacgtcttatccgTTAGTGTAGCgtgtaggctggagctgcttcg | construction of S04698-09 WIT   |
| oGT05_WITS_4                 | aggattagcctctctatgaatgccggatggcggcgtgaacgtcttatccgTCTACTGAGTgtgtaggctggagctgcttcg | construction of S01960-05       |
| oGT05_WITS_13                | aggattagcctctctatgaatgccggatggcggcgtgaacgtcttatccgGAAGTGAGACgtgtaggctggagctgcttcg | construction of S00065-06       |
| oGT05_WITS_14                | aggattagcctctctatgaatgccggatggcggcgtgaacgtcttatccgGATAGATAGCgtgtaggctggagctgcttcg | construction of S01569-10       |
| oGT05_WITS_15                | aggattagcctctctatgaatgccggatggcggcgtgaacgtcttatccgTGAGACCTATgtgtaggctggagctgcttcg | construction of S07292-07       |
| oGT05_WITS_16                | aggattagcctctctatgaatgccggatggcggcgtgaacgtcttatccgTGTAGATTCCgtgtaggctggagctgcttcg | construction of 11020-1996      |
| oGT02_WITS                   | tttgtgatgaactcaaagaagtgcaggggaataatgggtcatgcaggccatatgaatatcctccttagt             | construction of all WIT strains |
| Primers for allelic exchange |                                                                                   |                                 |
| invAko-f                     | cagcgatatccaaatgttgcatagatcttttcttaattaagcccgtgtaggctggagctgcttcg                 | SL1344 $\Delta$ invA::kan       |
| invAko-r                     | actattgaaaagctgtcttaatttaataataacaggataacctatacatatgaatatcctccttagt               | SL1344 $\Delta$ invA::kan       |
| csgDko-f                     | agtaactctgctgtacaatccaggtcagatagcgtttcatggccgtgtaggctggagctgcttcg                 | SL1344 $\Delta$ csgD::kan       |
| csgDko-r                     | gggggcagctgtcagatgtgcgattaaaaaaagtggagtctcatccatatgaatatcctccttagt                | SL1344 $\Delta$ csgD::kan       |
| primers for qRT-PCR          |                                                                                   |                                 |
| Gapdh-f                      | TGTAGACCATGTAGTTGAGGTCA                                                           | qRT-PCR of Gapdh                |
| Gapdh-r                      | AGGTCGGTGTGAACGGATTTG                                                             | qRT-PCR of Gapdh                |
| Cxl1-f                       | ATGGCTGGGATTCACCTCAA                                                              | qRT-PCR of Cxl1                 |
| Cxl1-r                       | AGTGTGGCTATGACTTCGGTTT                                                            | qRT-PCR of Cxl1                 |
| Nos2-f                       | TTGGGTCTTGTTCACTCCACGG                                                            | qRT-PCR of Nos2                 |
| Nos2-r                       | CCTCTTTCAGGTCACCTTGGTAGG                                                          | qRT-PCR of Nos2                 |



**Supplementary Table 2.** Sequence data for quantification of strains S01960-05, S07292-07, 11020-1996, S04698-09, S00065-06 and S01569-10

in the faeces, intestinal lumen and tissue of pigs.

| <b>sample type</b>     | <b>pig number</b> | <b>Sample Name</b> | <b>Accession</b> | <b>BioProject</b> |
|------------------------|-------------------|--------------------|------------------|-------------------|
| Challenge inoculum     | N/A               | SM0024             | SAMN15596641     | PRJNA641292       |
| Ileal mucosa           | 1                 | SM0004             | SAMN15596642     | PRJNA641292       |
| Ileal mucosa           | 2                 | SM0005             | SAMN15596643     | PRJNA641292       |
| Ileal mucosa           | 3                 | SM0006             | SAMN15596644     | PRJNA641292       |
| Ileal mucosa           | 4                 | SM0007             | SAMN15596645     | PRJNA641292       |
| Mesenteric lymph node  | 1                 | SM0008             | SAMN15596646     | PRJNA641292       |
| Mesenteric lymph node  | 2                 | SM0028             | SAMN15596647     | PRJNA641292       |
| Mesenteric lymph node  | 3                 | SM0010             | SAMN15596648     | PRJNA641292       |
| Mesenteric lymph node  | 4                 | SM0011             | SAMN15596649     | PRJNA641292       |
| Colonic mucosa         | 3                 | SM0012             | SAMN15596650     | PRJNA641292       |
| Colonic mucosa         | 4                 | SM0013             | SAMN15596651     | PRJNA641292       |
| Colonic lymph node     | 2                 | SM0014             | SAMN15596652     | PRJNA641292       |
| Colonic lymph node     | 3                 | SM0015             | SAMN15596653     | PRJNA641292       |
| Colonic lymph node     | 4                 | SM0016             | SAMN15596654     | PRJNA641292       |
| Faecal sample at day 1 | 1                 | SM0033             | SAMN15596655     | PRJNA641292       |
| Faecal sample at day 1 | 2                 | SM0019             | SAMN15596656     | PRJNA641292       |
| Faecal sample at day 2 | 3                 | SM0034             | SAMN15596657     | PRJNA641292       |
| Faecal sample at day 2 | 4                 | SM0021             | SAMN15596658     | PRJNA641292       |
