# Supplementary material for: Ecological niche adaptation of Salmonella Typhimurium U288 is associated with altered pathogenicity and reduced zoonotic potential
Source: PubMed Central journal article supplement (PMC8065163; doi:10.1038/s42003-021-02013-4), 2021-04-23
Supplement: 42003_2021_2013_MOESM3_ESM.pdf [file 42003_2021_2013_MOESM3_ESM.pdf]

## **Description of Additional Supplementary Files**

**File name:** Supplementary Data 1

**Description:** Whole genome sequence data analysed in this study.
